# Supplementary material for: Microbial Synthesis of Heme b: Biosynthetic Pathways, Current Strategies, Detection, and Future Prospects
Source: MDPI journal article supplement (doi:10.3390/molecules28083633), 2023-04-21
Supplement: s1 [file s1]

# Microbial Synthesis of Heme *b*: Biosynthetic Pathways, Current Strategies, Detection, and Future Prospects

Qiuyu Yang <sup>1,2</sup>, Juntao Zhao <sup>1,2</sup>, Yangyang Zheng <sup>1,2</sup>, Tao Chen <sup>1,2</sup> and Zhiwen Wang <sup>1,2,\*</sup>

<sup>1</sup> Frontier Science Center for Synthetic Biology and Key Laboratory of Systems Bioengineering (Ministry of Education), Tianjin University, Tianjin 300072, China

<sup>2</sup> SynBio Research Platform, Collaborative Innovation Center of Chemical Science and Engineering (Tianjin), School of Chemical Engineering and Technology, Tianjin University, Tianjin 300072, China

\* Correspondence: zww@tju.edu.cn; Tel.: +86-22-85356605

## Supplementary Information

**Table S1.** Calculated  $\Delta G^0$  values for the production of heme *b*.

| Enzymes | Reactions (Substrates → Products)                                                                    | $\Delta G^0$<br>(kJ/mol) |
|---------|------------------------------------------------------------------------------------------------------|--------------------------|
| AlaS    | Succinyl-CoA + Gly + ATP → 5-ALA + CoA + CO <sub>2</sub> + AMP + PP <sub>i</sub>                     | 25.73                    |
| GluTS   | L-Glu + Glu <sup>tRNA</sup> + ATP → L-Glu-Glu <sup>tRNA</sup> + AMP + PP <sub>i</sub>                | -369.36                  |
| GluTR   | L-Glu-Glu <sup>tRNA</sup> + NADPH + H <sup>+</sup> → GSA + Glu <sup>tRNA</sup> + NADP <sup>+</sup>   | 372.94                   |
| GsaM    | GSA → 5-ALA                                                                                          | -6.11                    |
| PbgS    | 2 5-ALA → PBG + 2 H <sub>2</sub> O                                                                   | -141.13                  |
| HmbS    | 4 PBG + H <sub>2</sub> O → HMB + 4 NH <sub>3</sub>                                                   | -207.52                  |
| UroS    | HMB → UPG III + H <sub>2</sub> O                                                                     | -55.13                   |
| UroD    | UPG III → CPG III + 4 CO <sub>2</sub>                                                                | -14.12                   |
| CgdC    | CPG III + 2 SAM → PPG IX + 2 5'-deoxyadenosine + 2 L-methionine + 2 CO <sub>2</sub>                  | -115.27                  |
| PgoX    | PPG IX + 3 O <sub>2</sub> → PP IX + 3 H <sub>2</sub> O <sub>2</sub>                                  | -622.83                  |
| PpfC    | PP IX + Fe <sup>2+</sup> → Heme + 2 H <sup>+</sup>                                                   | 244.65                   |
| CgoX    | CPG III + 3 O <sub>2</sub> → CP III + 3 H <sub>2</sub> O <sub>2</sub>                                | -662.83                  |
| CpfC    | CP III + Fe <sup>2+</sup> → coproporphyrin III + 2 H <sup>+</sup>                                    | 244.65                   |
| ChdC    | coproporphyrin III + 2 H <sub>2</sub> O <sub>2</sub> → Heme + 2 CO <sub>2</sub> + 4 H <sub>2</sub> O | -562.79                  |
